# Supplementary material for: Assessment of Uptake, Accumulation and Degradation of Paracetamol in Spinach (Spinacia oleracea L.) under Controlled Laboratory Conditions
Source: Plants (Basel). 2022 Jun 21;11(13):1626. doi: 10.3390/plants11131626 (PMC9269112; doi:10.3390/plants11131626)
Supplement: Supplementary file 1 [file plants-11-01626-s001.zip › Supplementary file- Revised V2.pdf]

# Assessment of Uptake, Accumulation and Degradation of Paraceta-mol in Spinach (*Spinacia oleracea* L.) under Controlled Laboratory Conditions

**Supplementary Table S1.** Results of one-way ANOVAs showing the effect of different paracetamol treatments on the morphological attributes of spinach after 8 days.

| Morphological attributes                | df | F     | P      |
|-----------------------------------------|----|-------|--------|
| Shoot length                            | 3  | 45.33 | <0.001 |
| Root length                             | 3  | 10.90 | <0.01  |
| Leaf number                             | 3  | 4.85  | <0.05  |
| Growth tolerance index of shoots (GTIS) | 2  | 74.87 | <0.001 |
| Growth tolerance index of roots (GTIR)  | 2  | 1.20  | ns     |

ns: non-significant at  $p \leq 0.05$ .

**Supplementary Table S2.** Results of one-way ANOVAs showing the effect of different paracetamol treatments on the concentration (mg/kg DW) of several macronutrients, micronutrients and sodium in spinach shoots and roots after 8 days.

| Elements in spinach shoots (mg/kg DW) | df | F-Ratio | p-Value |
|---------------------------------------|----|---------|---------|
| Ca                                    | 3  | 72.44   | <0.001  |
| K                                     | 3  | 21.69   | <0.001  |
| Mg                                    | 3  | 276.93  | <0.001  |
| Fe                                    | 3  | 186.86  | <0.001  |
| Mn                                    | 3  | 4.45    | <0.05   |
| Na                                    | 3  | 5.65    | <0.001  |
| Elements in spinach roots (mg/kg DW)  | df | F-Ratio | p-Value |
| Ca                                    | 3  | 6.43    | <0.05   |
| K                                     | 3  | 26.32   | <0.001  |
| Mg                                    | 3  | 7.70    | <0.01   |
| Fe                                    | 3  | 13.08   | <0.05   |
| Mn                                    | 3  | 5.61    | <0.05   |
| Na                                    | 3  | 1.52    | ns      |

ns: non-significant at  $p \leq 0.05$ .

**Supplementary Table S3.** Results of One-way ANOVAs showing the effect of different paracetamol treatments on C, H, N, and S percentage in spinach.

| Elements | df | F     | P      |
|----------|----|-------|--------|
| C        | 3  | 1.38  | ns     |
| H        | 3  | 0.68  | ns     |
| N        | 3  | 22.91 | <0.001 |
| S        | 3  | 7.50  | <0.05  |

ns: non-significant at  $p \leq 0.05$

Supplementary Table S4. Gradient separation method for LC-MS analysis of paracetamol.

| 19          | Flow rate |    |    |
|-------------|-----------|----|----|
| 20Time(min) | ml/min    | A% | B% |
| 21 Initial  | 0.3       | 95 | 5  |
| 22 0.5      | 0.3       | 95 | 5  |
| 23 3.5      | 0.3       | 50 | 50 |
| 24 5.5      | 0.3       | 30 | 70 |
| 25 6        | 0.3       | 95 | 5  |

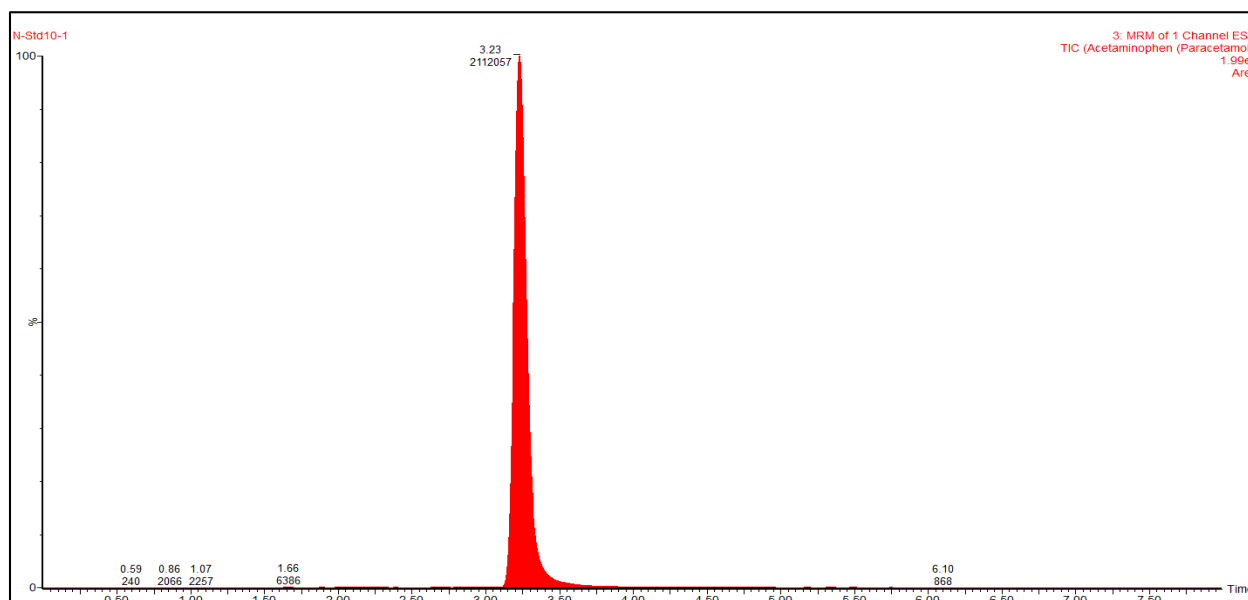

Supplementary Figure S1. LC/MS chromatogram of Paracetamol (Acetaminophen) standard.

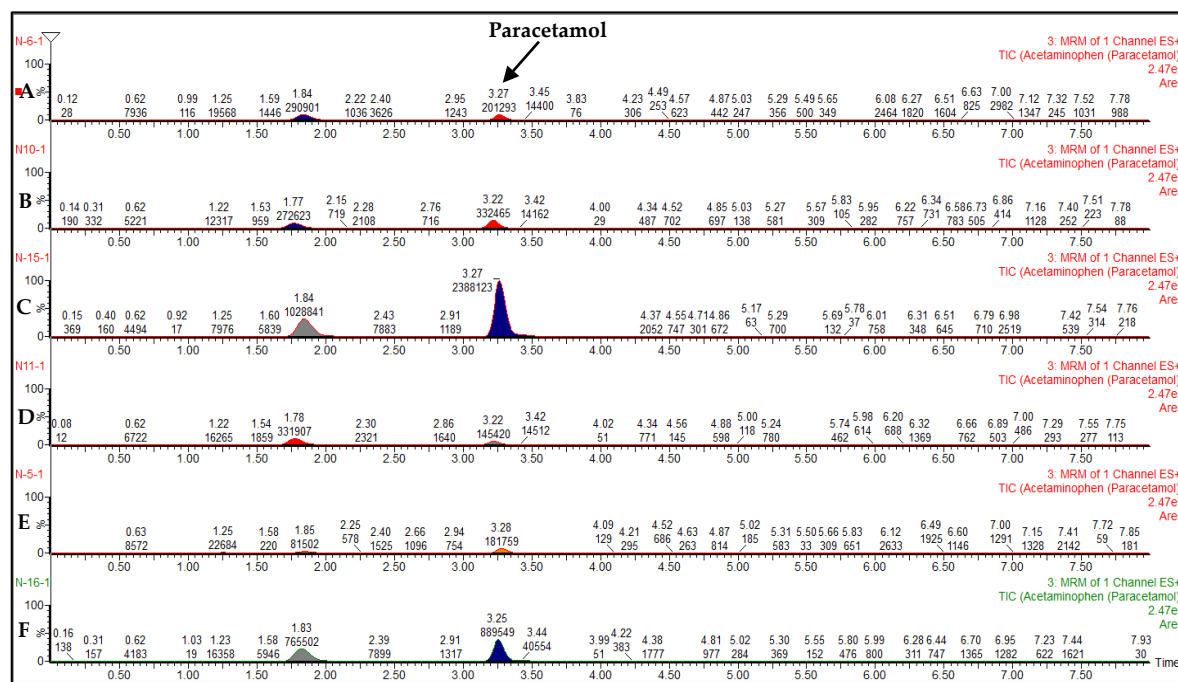

**Paracetamol**

**A** 3: MRM of 1 Channel ES  
TIC (Acetaminophen (Paracetamol))  
1.65e6  
Area

**B** 3: MRM of 1 Channel ES  
TIC (Acetaminophen (Paracetamol))  
1.65e6  
Area

**C** 3: MRM of 1 Channel ES  
TIC (Acetaminophen (Paracetamol))  
1.65e6  
Area

**Supplementary Figure S4.** LC/MS chromatograms showing the concentration of paracetamol (Retention time: 3.2 min) in spinach dry leaves for (A) 50 mg/L, (B) 100 mg/L, and (C) 200 mg/L paracetamol treatments after 8 days.

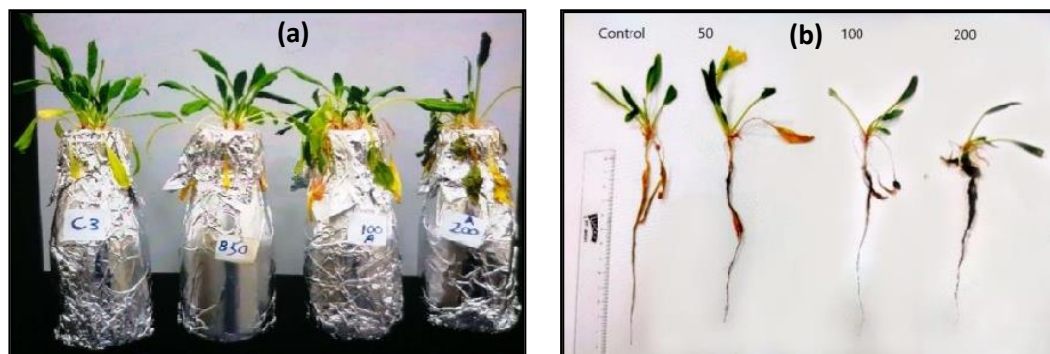

**Supplementary Figure S5.** Images of untreated (control) and treated spinach plants with 50 mg/L, 100 mg/L, and 200 mg/L paracetamol (a,b).
